# Supplementary material for: The intraoperative standard care training program for transplanted organs: A quality improvement study to enhance knowledge and self-efficacy of operating room nurses
Source: Research Square preprint supplement (doi:10.21203/rs.3.rs-7636938/v1), 2025-12-26
Supplement: Supplementary file 1 [file 03e29d94cf593f9789710f5b.docx]

# Organ Transplant Intraoperative Care Knowledge Test

In the Name of God

Thank you for agreeing to participate in this research project. The following questions are designed to assess your knowledge regarding intraoperative care of transplanted organs. Please read each question carefully and select the most appropriate answer. We sincerely appreciate your careful and accurate responses.

Note:
This test consists of two sections:
- Section I (General Standards): covers general care principles applicable to all types of transplanted organs.
- Section II (Specialized Standards): focuses on specialized care for specific organs — kidney and liver.

You will have 20 minutes to answer all 20 questions.
There is no negative marking in this test.

## Section I – General Standards

1. What is the maximum pulmonary ventilation volume in an organ donor?
a) 6–8 mL/kg
b) 8–10 mL/kg
c) 10–15 mL/kg
d) 4–6 mL/kg

2. What is the safe urine output in an organ donor?
a) 1–3 mL/hr
b) More than 4 mL/hr
c) 4–6 mL/hr
d) 8–10 mL/hr

3. What is the normal range of core body temperature in an organ donor?
a) 20–30°C
b) More than 34°C
c) 30–34°C
d) 28–34°C

4. What is the appropriate surgical position for organ harvesting?
a) Supine
b) Prone
c) Lateral
d) Lithotomy

5. What is the incision used in organ harvesting?
a) Gibson incision
b) Flank incision
c) Laparotomy–sternotomy incision
d) Thoracoabdominal incision

6. The harvested organ must be placed in at least how many sterile bags?
a) 1 bag
b) 2 bags
c) 3 bags
d) 4 bags

7. Which information must be recorded on the organ transport ice box?
a) Patient’s identification and blood group
b) Only patient’s identification
c) Blood group and UNOS code
d) Only UNOS code

8. What is the first task the surgical technologist must perform when setting up for a transplant surgery?
a) Prepare the operating table
b) Set up suction and electrosurgical unit
c) Bring required instruments and equipment
d) Set up the ice machine

9. Which of the following should be documented before surgery?
a) Recipient’s name and organ type
b) Recipient’s name and blood group
c) Blood group, UNOS code, and organ type
d) UNOS code only

10. Which of the following personnel coordinate with the transplant coordinator during intraoperative procedures?
a) Circulating nurse and scrub nurse
b) Scrub nurse and surgeon
c) Circulating nurse and surgeon
d) Only surgeon

## Section II – Specialized Standards

### Kidney Transplant

1. What is the appropriate arterial perfusion volume for kidney harvesting?
a) 50–70 mL/kg of UW or Soltran solution
b) 70–100 mL/kg of UW solution
c) 100–120 mL/kg of UW solution
d) 700–1000 mL of UW solution

2. What is the appropriate venous perfusion volume for kidney harvesting?
a) 1 liter of UW solution
b) 2 liters of UW solution
c) 150 mL/kg of UW solution
d) 200 mL/kg of saline

3. What is the suitable solution and volume for kidney packing?
a) 300 mL/kg of UW or Soltran solution
b) 250 mL/kg of UW or Soltran solution
c) 500 mL/kg of Ringer’s lactate
d) 200 mL/kg of Ringer’s lactate

4. What is the suitable solution and volume for back-table preparation of the kidney?
a) 200–300 mL/kg of Ringer’s solution
b) 100–200 mL/kg of UW or Soltran solution
c) 200–300 mL/kg of UW or Soltran solution
d) 500–1000 mL/kg of Ringer’s solution

5. For pediatric kidney donors, which solution and temperature are used for perfusion?
a) UW solution at 37°C
b) UW solution at room temperature
c) Hartmann’s solution at 37°C
d) Hartmann’s solution at room temperature

### Liver Transplant

1. What is the appropriate arterial perfusion volume for liver harvesting?
a) 50–70 mL/kg of UW or Soltran solution
b) 70–100 mL/kg of UW solution
c) 100–150 mL/kg of UW solution
d) 70–100 mL/kg of Ringer’s solution

2. What is the appropriate venous perfusion volume for liver harvesting?
a) 1.5 liters of UW solution
b) 2 liters of UW solution
c) 1 liter of UW solution
d) 3 liters of UW solution

3. What is the suitable solution and volume for back-table preparation of the liver?
a) 200–500 mL/kg of UW solution
b) 200–300 mL/kg of UW solution
c) 400–600 mL/kg of Ringer’s solution
d) 200–500 mL/kg of Ringer’s solution

4. What is the suitable solution and volume for cooling and packing of the liver?
a) 3 liters of UW solution
b) 2 liters of UW solution
c) 1 liter of UW solution
d) 1.5 liters of UW solution

5. Which is the first organ to be removed from the abdominal cavity during multi-organ harvesting?
a) Pancreas
b) Liver
c) Kidney
d) Small intestine
