# Supplementary material for: The intraoperative standard care training program for transplanted organs: A quality improvement study to enhance knowledge and self-efficacy of operating room nurses
Source: Research Square preprint supplement (doi:10.21203/rs.3.rs-7636938/v1), 2025-12-26
Supplement: Supplementary file 2 [file f760a421fafc07b9c85b514b.docx]

# Self-Efficacy Questionnaire

In the name of God

Dear participant,

Thank you for agreeing to take part in this research project. The following questions are designed to assess your level of self-efficacy in caring for transplanted organs during surgery. Please read each statement carefully and mark one of the five options that best represents your level of agreement with the statement. We sincerely appreciate your accurate and thoughtful responses.

Note:
This questionnaire includes 12 items and takes approximately 12 minutes to complete. There are no negative scores in this questionnaire.

## Demographic Information

Code: ___________________________

Age: ____________________________

Gender: ☐ Male ☐ Female

Years of work experience: ____________________________

Experience in transplant team: ____________________________

Education level: ____________________________

## Response Scale

1. Strongly Agree

2. Agree

3. Neutral

4. Disagree

5. Strongly Disagree

## Items

| No. | Statement |
| --- | --- |
| 1 | I rely on myself to perform the necessary preoperative tasks such as positioning the organ donor and preparing the required equipment. |
| 2 | I have sufficient knowledge about the number of bags needed for organ packing and the type of solution used in each bag. |
| 3 | I am able to organize the appropriate solution for arterial and venous perfusion during liver and kidney harvesting. |
| 4 | I am able to organize the appropriate solution for back table preparation of the liver and kidney. |
| 5 | I am able to organize the appropriate solution for cooling and packing the liver and kidney for transport. |
| 6 | I can prioritize the steps required for organ removal in the donor. |
| 7 | I am sufficiently skilled in documenting the required information regarding organ perfusion solutions. |
| 8 | I can prioritize the necessary activities during transplant operating room setup. |
| 9 | I am sufficiently familiar with the various drugs and perfusion solutions used for organ donors. |
| 10 | I can easily identify the type of surgical suture used for ligating vessels. |
| 11 | I am sufficiently skilled in documenting the necessary information on the ice box containing the organ. |
| 12 | I am sufficiently skilled in completing the required documentation prior to transplantation surgery. |
